# Supplementary material
Source: PubMed Central journal article supplement (PMC2268535)

a)

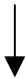

Lapatinib MW = 581 Da

Shift = 0 Da

40573 (EGFR (678-1020))

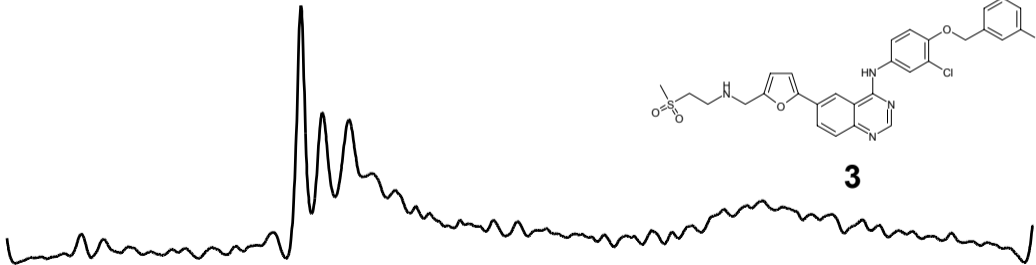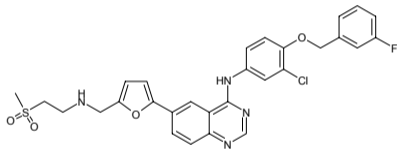

**3**

Supplement: pnas_0708281105_3.pdf [file pnas_0708281105_3.pdf]
